# Supplementary material for: In Vitro Monitoring of Magnesium-Based Implants Degradation by Surface Analysis and Optical Spectroscopy
Source: MDPI journal article supplement (doi:10.3390/ijms23116099), 2022-05-29
Supplement: s1 [file s1]

**Table S1:** Quantitative composition and elementary identification information for Mg alloy in atomic percentage with SD

| Concentration (atomic percentage) |                  |                  |                  |                  |
|-----------------------------------|------------------|------------------|------------------|------------------|
| Pure Mg                           |                  |                  |                  |                  |
| Element                           | Day 0, Error(%)  | Day 2, Error(%)  | Day 5, Error(%)  | Day 10, Error(%) |
| Magnesium                         | 74.01± 4.41, 4.2 | 33.13± 5.69, 1.7 | 15.44± 2.35, 1.3 | 16.94± 2.38, 1.2 |
| Oxygen                            | 10.92± 4.91, 1.6 | 46.47± 3.86, 4.8 | 61.37± 0.91, 5.9 | 63.32± 2.47, 6   |
| Carbon                            | 15.05± 2.13, 2.7 | 16.89± 2.16, 1.7 | 16.27± 0.32, 2.1 | 14.31±1.20, 1.8  |
| Calcium                           | 0                | 1.82± 0.03, 0.2  | 3.71± 1.47, 0.3  | 3.07± 0.46, 0.2  |
| Phosphorus                        | 0                | 1.58± 0.25, 0.2  | 3.19± 0.26, 0.2  | 2.35± 0.19, 0.1  |
| Ti                                |                  |                  |                  |                  |
| Titanium                          | 100±0, 3         | 94.29± 4.46, 2.8 | 86.42±1.55, 2.8  | 91.48± 2.52, 2.6 |
| Nitrogen                          | 0                | 3.35± 0.36, 0.3  | 2.85± 1.32, 0.2  | 6.22± 1.12, 0.3  |
| Oxygen                            | 0                | 5.94± 4.5, 1.1   | 11.86± 0.09, 1.5 | 2.3± 1.40, 0.8   |
